# Supplementary material for: Chromosomal microarray analysis vs. karyotyping for fetal ventriculomegaly: a meta-analysis
Source: PubMed Central journal article supplement — Chin Med J (Engl). 2021 Sep 20;135(3):268–75. doi: 10.1097/CM9.0000000000001683 (PMC8812611; doi:10.1097/cm9.0000000000001683), 2021-09-20
Supplement: cm9-135-268-s001.pdf [file cm9-135-268-s001.pdf]

**Supplementary Table1: Quality assessment of included studies evaluated by NOS.**

| Study                  | Selection | Comparability | Outcomes | Total scores |
|------------------------|-----------|---------------|----------|--------------|
| Tomlinson <sup>4</sup> | 4         | 2             | 2        | 8            |
| Vergani <sup>5</sup>   | 4         | 1             | 2        | 7            |
| Greco <sup>6</sup>     | 4         | 2             | 2        | 8            |
| Gaglioti <sup>7</sup>  | 4         | 2             | 1        | 7            |
| Breeze <sup>8</sup>    | 4         | 1             | 2        | 7            |
| Ouahba <sup>9</sup>    | 4         | 2             | 2        | 8            |
| Weichert <sup>10</sup> | 4         | 2             | 2        | 8            |
| Madazli <sup>11</sup>  | 4         | 1             | 1        | 6            |
| Sethna <sup>12</sup>   | 4         | 2             | 2        | 8            |
| Gezer <sup>13</sup>    | 4         | 2             | 1        | 7            |
| Chu <sup>14</sup>      | 4         | 2             | 2        | 8            |
| Gezer <sup>15</sup>    | 4         | 1             | 1        | 6            |
| Chang <sup>16</sup>    | 4         | 1             | 1        | 6            |
| Song <sup>17</sup>     | 4         | 2             | 2        | 8            |
| Zhang <sup>22</sup>    | 4         | 1             | 2        | 7            |
| Li <sup>19</sup>       | 4         | 2             | 2        | 8            |
| Peng <sup>21</sup>     | 4         | 2             | 2        | 8            |
| Hannon <sup>18</sup>   | 4         | 1             | 1        | 6            |
| Shaffer <sup>23</sup>  | 4         | 1             | 2        | 7            |
| Donnelly <sup>20</sup> | 4         | 1             | 1        | 6            |
| Hu <sup>24</sup>       | 4         | 2             | 2        | 8            |
| Bardin <sup>26</sup>   | 4         | 1             | 1        | 6            |
| Duan <sup>25</sup>     | 4         | 1             | 1        | 6            |

NOS: The Newcastle-Ottawa scale. Selection: 1. Representative for the population; 2. Ascertainment of exposure; 3. Consecutive patients; 4. Outcome not present at the start of the study. Outcomes: 1. Assessment of outcome well performed; 2. Chromosome abnormality well described; 3. Adequacy of patient

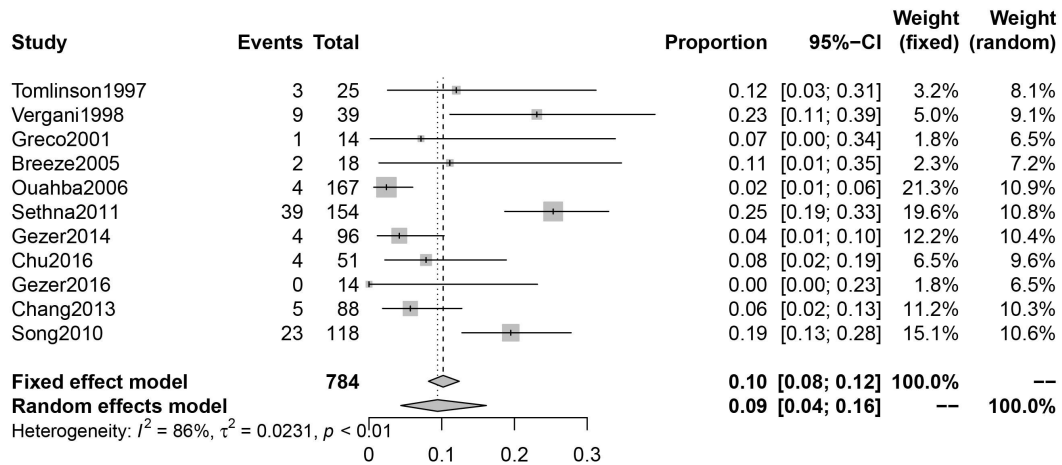

**Supplementary Figure 1: Incidence of chromosomal abnormalities in mild VM.**

CI: Confidence interval; VM: Ventriculomegaly.

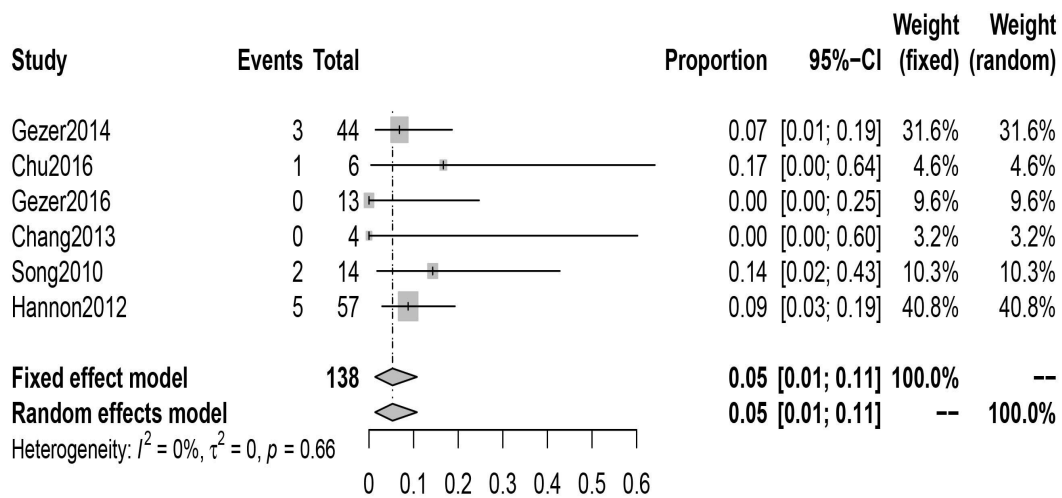

**Supplementary Figure 2: Incidence of chromosomal abnormalities in severe VM.**

CI: Confidence interval; VM: Ventriculomegaly.

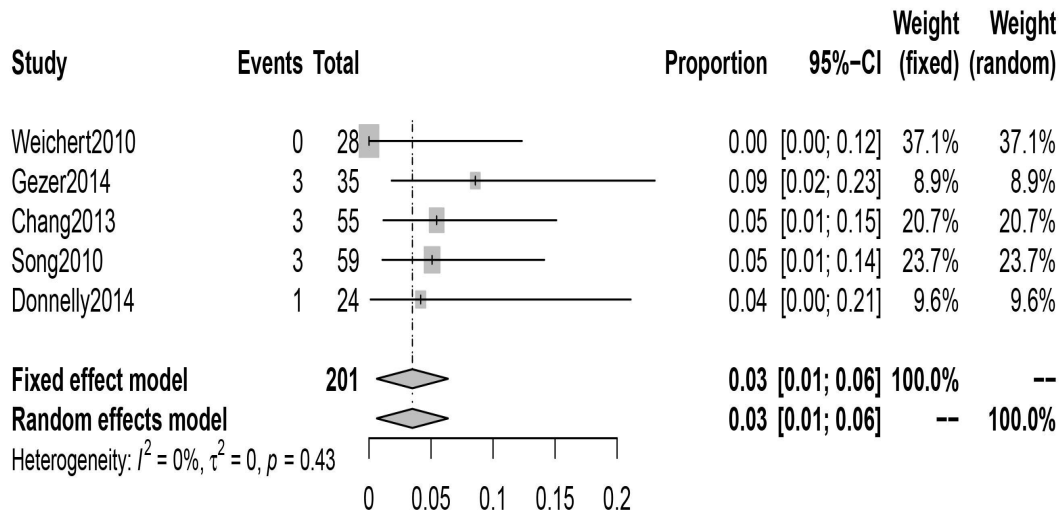

**Supplementary Figure 3:** Incidence of chromosomal abnormalities in isolated VM.

CI: Confidence interval; VM: Ventriculomegaly.

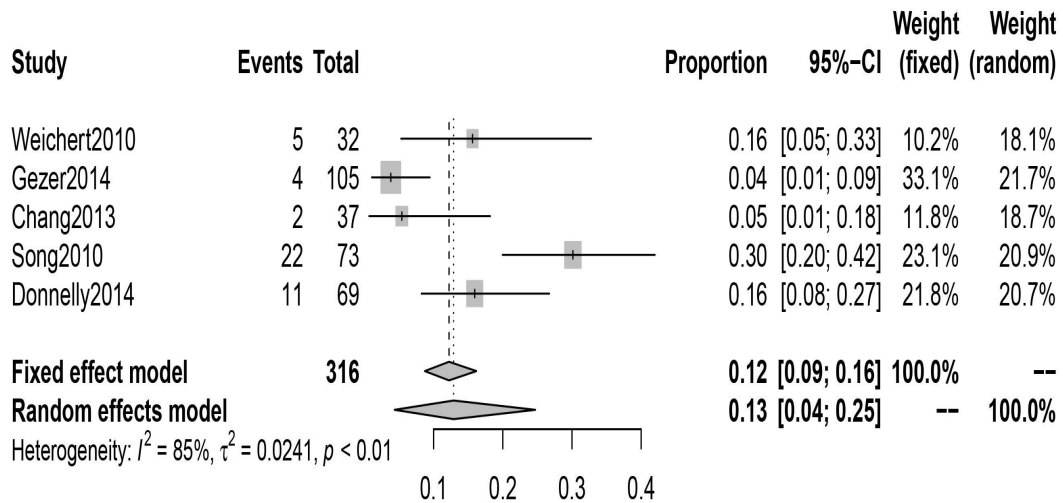

**Supplementary Figure 4:** Incidence of chromosomal abnormalities in

non-isolated VM. CI: Confidence interval; VM: Ventriculomegaly.

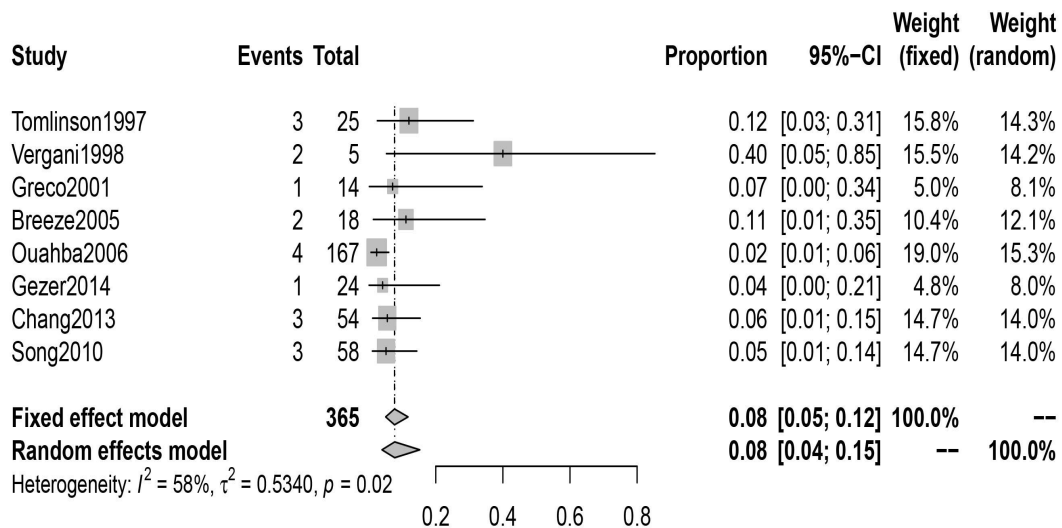

**Supplementary Figure 5: Incidence of chromosomal abnormalities in isolated mild VM. CI: Confidence interval; VM: Ventriculomegaly.**

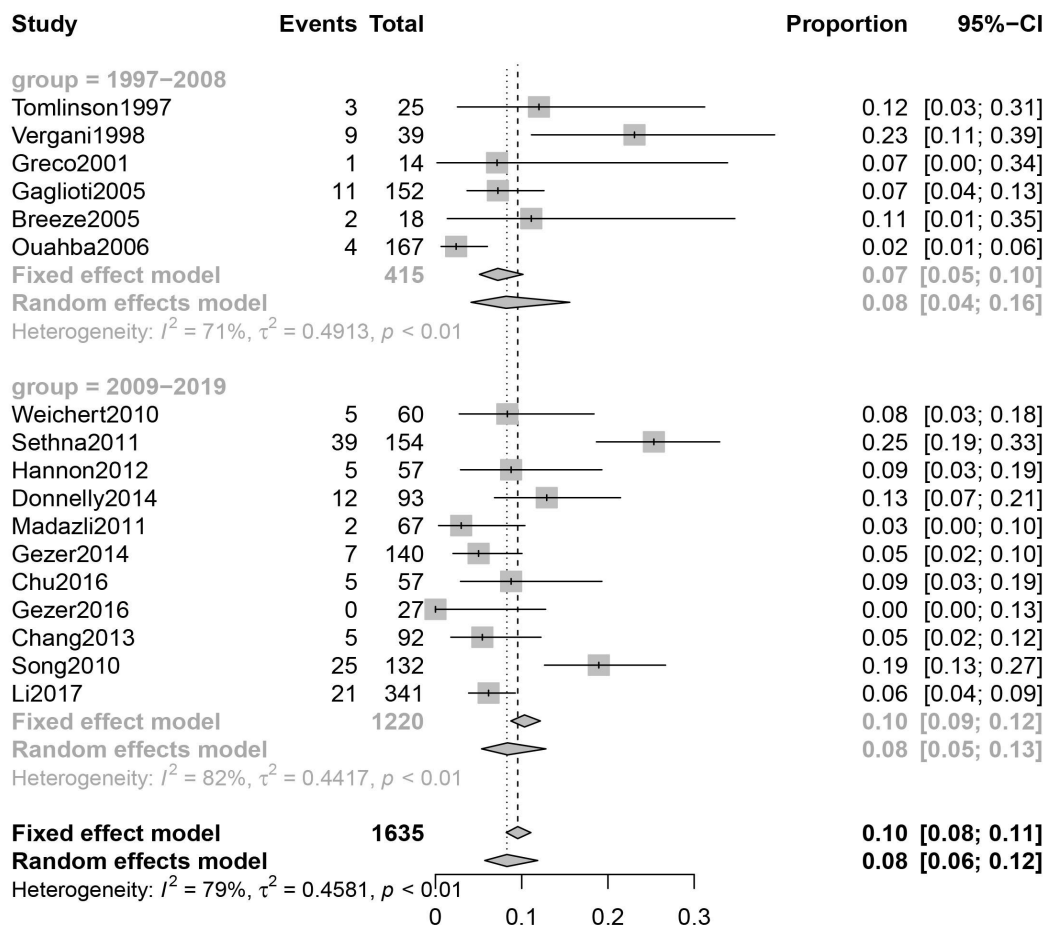

**Supplementary Figure 6: Subgroup analysis of Karyotyping with different publication year. CI: Confidence interval.**

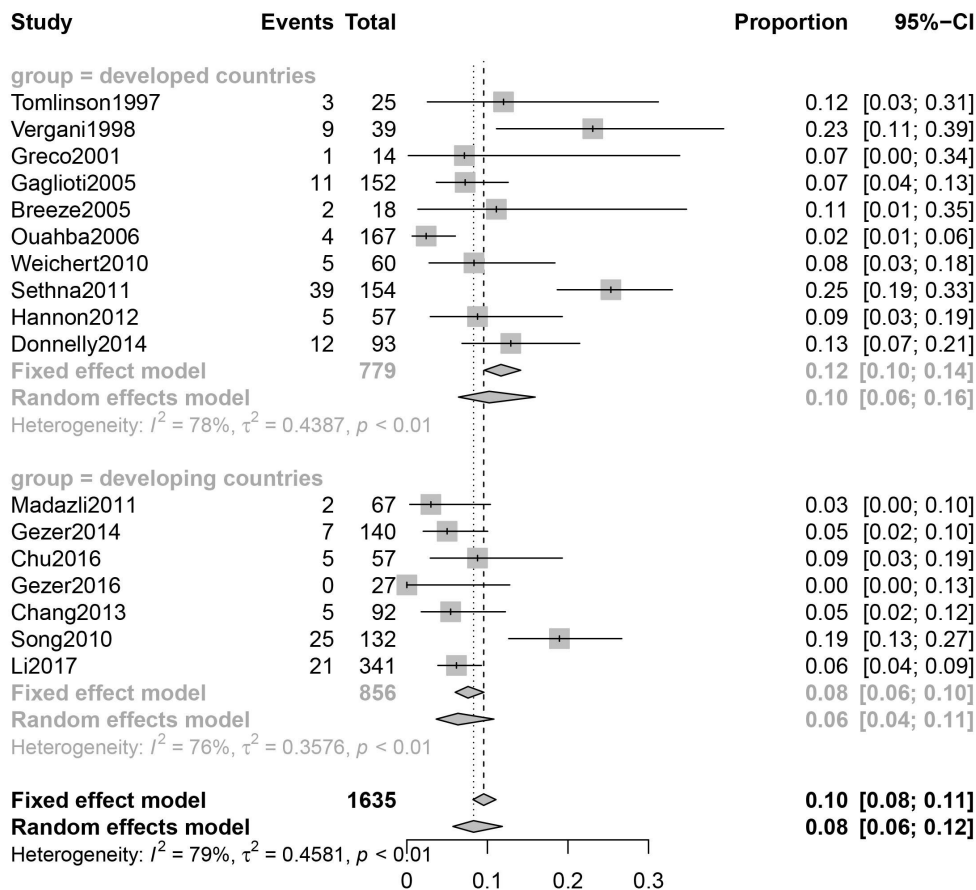

**Supplementary Figure 7:** Subgroup analysis of Karyotyping with different countries.

CI: Confidence interval.

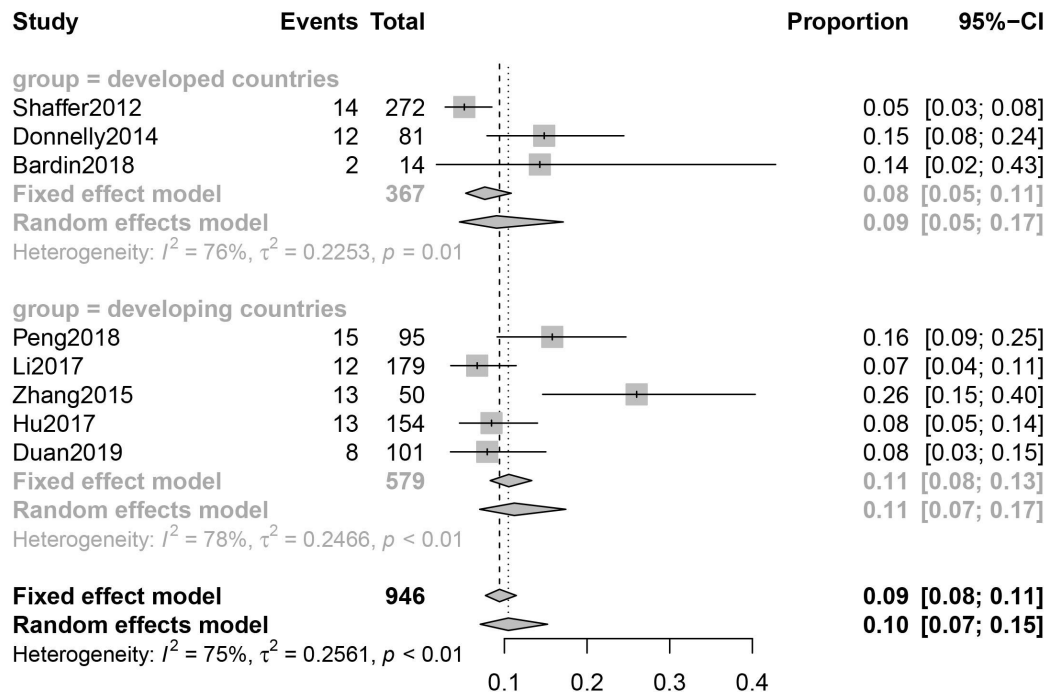

**Supplementary Figure 8:** Subgroup analysis of CMA. CI: Confidence interval;

CMA: Chromosomal microarray analysis.

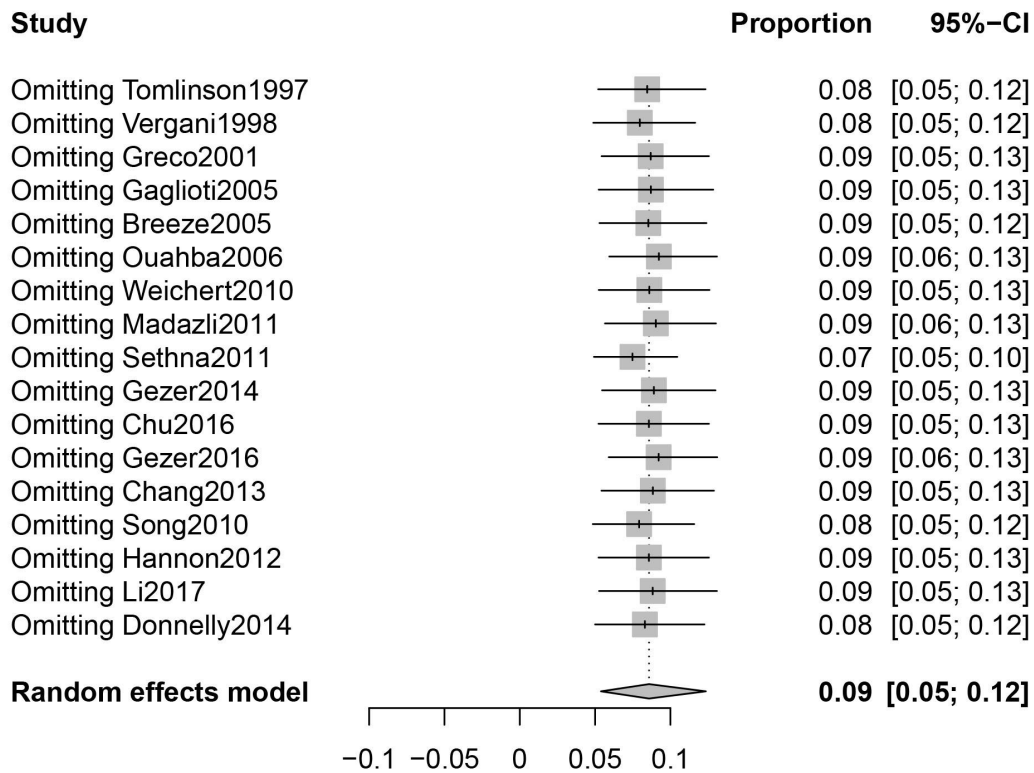

**Supplementary Figure 9:**Sensitivity analysis of Karyotypin

CI: Confidence interval.

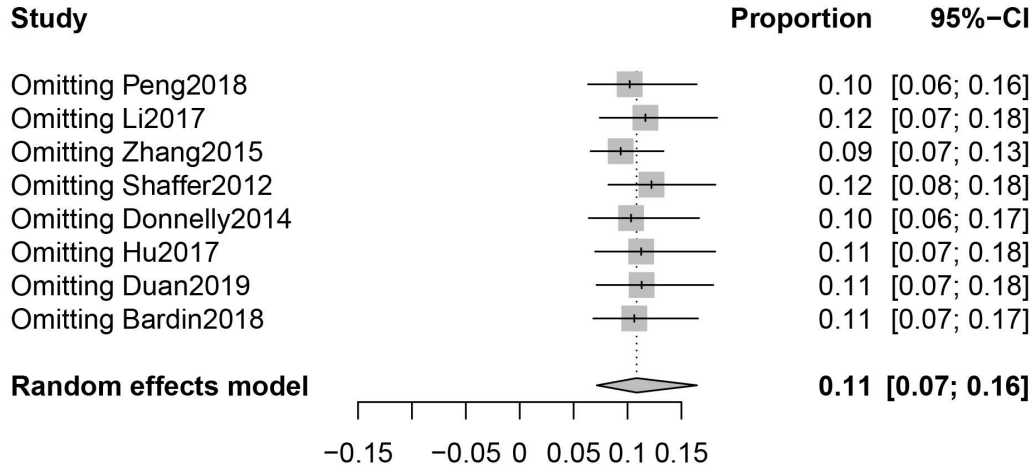

**Supplementary Figure 10:** Sensitivity analysis of CMA. CI: Confidence interval;

CMA: Chromosomal microarray analysis.
